# Supplementary material for: Intracoronary Delivery of Porcine Cardiac Progenitor Cells Overexpressing IGF-1 and HGF in a Pig Model of Sub-Acute Myocardial Infarction
Source: MDPI journal article supplement (doi:10.3390/cells10102571), 2021-09-28
Supplement: s1 [file s1]

## Supplementary Methods

### RNA-Seq analysis

Sequenced reads were quality-controlled and pre-processed using Cutadapt v1.6 [1] to remove adaptor contaminants, as described previously [2]. Resulting reads were aligned and gene expression quantified using RSEM v1.1.19 [3] over human reference GRCh37 and Ensembl genebuild 65. Only genes with at least 1 count per million in at least 3 samples were considered for statistical analysis. Data were then normalized and differential expression tested using the Bioconductor package EdgeR v3.0.8 [4]. We considered as differentially expressed those genes with a Benjamini-Hochberg adjusted p value  $\leq 0.05$ . For the set of differentially expressed genes, functional analysis was performed using the topGO v2.10 Bioconductor R package [5] with annotations from org.Hs.eg.db and GO.db v2.8. For functional analysis, the genes at the extracellular space according to its GO annotations were used. Enrichment was performed using the full list of equally localized genes as reference. Top biological processes and molecular functions were selected using the Weighted Fisher method implemented by topGO with  $p < 0.01$ . To visualize relationships between genes and biological processes, a chord plot was generated using the R visualization package GOPlot [6].

### Plasmid construction

Human HGF was amplified from pBABE-puro TPR-HGF plasmid (from Bob Weinberg's lab, Addgene plasmid #10901) using paired primers: 5'-CAGCTATCTAGAATGTGGGTGACCAAATC-3' and 5'-CAGCTACCCGGGTCATAGTATGTCAGCGCAT-3'; then it was cloned in the pRRLsin18.CMV.IRES.mCherry vector using XbaI/XmaI polylinker restriction sites to obtain the pRRLsin18.CMV.HGF.IRES.mCherry lentiviral vector. Rat IGF-1 was obtained from pExpress-IGF1 (Clon Image ref.7300903, Gene service) using specific primers: 5'-CAGCTAGGATCCATGTCGTCTTCACATCTC-3' and 5'-CAGC-TACCCGGGTCATAGTATGT CAGCGCAT-3'; then the insert was cloned in the Bam-HI-XmaI unique restriction sites of donor pRRLsin18.CMV.IRES.eGFP lentiviral shuttle vector to obtain the pRRLsin18.CMV.IGF1.IRES.eGFP vector. Both lentiviral vectors, pRRLsin18.CMV.HGF.IRES.mCherry and pRRLsin18.CMV.IGF1.IRES.eGFP, were functionally validated by immunofluorescence (IF) and western blot by transfection in HEK293T cells with lipofectamine 2000 (ThermoFisher Scientific), following the provider instructions.

Sequence alignments of rat IGF-1 and human HGF translated proteins were confirmed to be 93.5% and 93.3% identical with respective porcine proteins (AAH86374.2 versus NP\_999421.1, and AAG53460.1 versus XP\_013835241.2, respectively), with few non-conservative amino acids.

### Lentiviral particle production

Viral particles were produced by transient plasmid transfection into HEK293T cells grown in DMEM-high glucose, 10% heat-inactivated FBS, 2 mM L-glutamine, 50 U/mL penicillin/streptomycin, and 2 mM Hepes (all reagents from Sigma-Aldrich). The day before transfection,  $1 \times 10^6$  trypsinized cells were seeded on poly-D-lysine (Sigma-Aldrich) treated wells from six-well plates. Each different lentiviral transfer vector (10  $\mu$ g DNA) was mixed with lentiviral helper plasmids (pRSV-Rev and pMDLg/pRRE packaging vectors; and pMD2.VSVG envelope-encoding vector) in an equimolar ratio using the calcium-phosphate co-precipitation

method. The following day, the transfection solution was removed, the cells were rinsed with 1X PBS, and medium without FBS was added to the cells. Viral supernatants were harvested at 48 h post-transfection, cleared by low-speed centrifugation, and filtered through a 0.45- $\mu$ m low-protein-binding filter (Corning). Viral stocks were concentrated by ultracentrifugation in a SW28 Beckman rotor at 90000 g (26000 rpm) for 2 h, at 4°C. Pellets containing lentiviral particles were air-dried and resuspended O/N at 4°C in 400-600  $\mu$ L of media. Viral titres (transducing units; TU/mL) were calculated by FACS analysis on transduced HEK293T cells and particles were quantified by RT-qPCR on supernatants (particles/mL). Values obtained were around  $10^7$ - $10^8$  TU/mL and in a 1:100 TU/particles ratio.

## ELISA

For quantification of secreted HGF and IGF-1, we assayed the conditioned medium generated by two hCPC isolates or the different engineered pCPC batches, cultured during 48 h in serum-free medium. We employed a specific ELISA, for the quantification of human IGF-1 (*R&D Systems; Cat. Num: DG100B*) or rat HFG (*R&D Systems; Cat. Num: MHG00*) following the manufacturer instructions.

## Supplementary Tables and Figures

**Table S1.** Antibodies used in flow cytometry, western blot and immunofluorescence (IF) assays.

| Antibody                                          | Catalog number (Company)             |
|---------------------------------------------------|--------------------------------------|
| anti-CD11R3 (FITC)-mouse anti-pig                 | MA5-28279 (Thermo Fisher Scientific) |
| anti-CD15 (PE)-mouse anti-human                   | 555402 (BD Pharmingen)               |
| anti-CD29 (FITC)-mouse anti-human                 | ab21845 (Abcam)                      |
| anti-CD31 (FITC)-mouse anti-human                 | 555445 (BD Pharmingen)               |
| anti-CD31 (FITC)-mouse anti-pig                   | MCA1746F (ABD Serotec)               |
| anti-CD34 (PE)-mouse anti-human                   | 555822 (BD Pharmingen)               |
| anti-CD44 (FITC)-rat anti-human                   | ab19622 (Abcam)                      |
| anti-CD45 (PE-Cy7)-mouse anti-human               | 557748 (BD Pharmingen)               |
| anti-CD45 (FITC)-mouse anti-pig                   | MCA1222F (ABD Serotec)               |
| anti-CD49f (FITC)-rat-anti-human                  | 555735 (BD Pharmingen)               |
| anti-CD73 (PE)-mouse anti-human                   | 550257 (BD Pharmingen)               |
| anti-CD90 (FITC)-mouse anti-human                 | 555595 (BD Pharmingen)               |
| anti-CD105 (FITC)-mouse anti-pig                  | ab53318 (Abcam)                      |
| anti-c-kit (CD117) human (APC)-mouse anti-human   | 550412 (BD Pharmingen)               |
| anti-c-kit (CD117) porcine (PE)-rabbit anti-human | A4502 (DakoCytomation)               |
| anti-CD166 (PE)-mouse anti-human                  | 559263 (BD Pharmingen)               |
| anti-tubulin (HRP)-goat anti-mouse                | P0447 (DAKO)                         |
| anti-GFP-rabbit polyclonal                        | ab290 (Abcam)                        |
| anti-IGF1 (H-70)-rabbit anti-human                | sc-9013 (Santa Cruz Biotech)         |
| anti-HGF (H-145)-rabbit polyclonal                | sc-7949 (Santa Cruz Biotech)         |
| mouse IgG1 (FITC)-isotype control                 | MG101 (Caltag Laboratories)          |
| mouse IgG2a (FITC)-isotype control                | ab1281 (Abcam)                       |
| mouse IgM- $\lambda$ -isotype control             | 550963 (BD Pharmingen)               |
| rat IgG2b (FITC)-isotype control                  | ab37364 (Abcam)                      |
| rat IgM (FITC)-isotype control                    | 553408 (BD Pharmingen)               |
| anti-rabbit (Alexa 488)-goat anti-rabbit          | A11034 (Invitrogen)                  |
| anti-rabbit (HRP)-goat anti-rabbit                | P0448 (DAKO)                         |
| anti-rabbit (Biotin)-goat anti-rabbit             | ab6720 (Abcam)                       |
| anti-rabbit (Alexa 568)-donkey anti-rabbit        | A10042 (Invitrogen)                  |
| Streptavidin (Cy3)                                | 43-4315 (Molecular Probes)           |
| Streptavidin (FITC)                               | 43-4311 (Molecular Probes)           |

APC = allophycocyanin; Cy3 = cyanine 3; HRP = horseradish peroxidase; FITC = fluorescein isothiocyanate; PE = phycoerythrin.

**Table S2.** Primer sequences used in quantitative real-time PCR (RT-qPCR) experiments.

| Gene             | Forward (5'-3')          | Reverse (5'-3')           |
|------------------|--------------------------|---------------------------|
| 36B4             | TCATCCAGCAGGTGTTTGAC     | CAGACATACGCTGGCAACAT      |
| ACT4             | GGGAATGGGACAAAAAGACA     | CATCCCAGTTGGTGATGATG      |
| ACTB             | CCCCTGCAGTTCGCCATGGAT    | CACCATCACGCCCTGGTGTCG     |
| ACTC1            | CTCCTTTGTCACCACTGCTGAGCG | AGCAGCTGTAGCCATCTCATTCTCA |
| Bmi1             | ATGCTGCCAATGGCTCTAAT     | CCTGTTCTGGTCAAAGAACTCA    |
| CACNG7           | TAAAGAACCAAGCCCACCAC     | TCAGCCTCTTCCTCGTGTTT      |
| CD9              | GAGGCACCAAGTGCATCAA      | AGCCATAGTCCAATGGCAAG      |
| CD26 (porcine)   | GGACTCTCAGCCCAAACGCCA    | GAGCCCTCCGGATCCACTGC      |
| CD29 (porcine)   | GCGTCGCCGAGTCTCCTCCT     | GACTCCCGCTCGGCCTGTCC      |
| CD44 (porcine)   | TCAACAGCACGCTGCCCACC     | GCATTGGGGTGGATCCGGGG      |
| CD49 (porcine)   | GGCAGGCAGGCTGGTGACAG     | GCCTGGAGAGGGGACCCTGG      |
| CD73 (porcine)   | CACAGCCGCCTGGAGCAGAC     | AGCAGCAGCACGTGGGGTTC      |
| CD98 (porcine)   | GGCACCGACTCCTCCGACCT     | AAGCTCCAGCTGCACCAGCG      |
| CD166 (porcine)  | ACCCCTTGAAGAAGCGGTGGTCA  | TCACAGAGCAGGTGAATGGCATTGT |
| CKIT             | TTCACAGAGACTTGGCGGCCA    | CGGGTAGCCGAGCGTTTCCTT     |
| CX3CR1           | CACTCACCATGTCCACCATC     | GGCCAAAGGCAAAAATAAGG      |
| CXCL12           | GTGTGTCAGGCCTCCGTCCG     | CCGGTTTCTCATCGCTGAGGCA    |
| FGFR2            | AAACACGTGGAAGAAGAACGG    | TCACATTGAACAGAGCCAGC      |
| FLK1             | CAAAACTGTCGTGATTCCATGTC  | TTCTGTTACCATCAGGAACAAACCT |
| F11R             | TCGAGAGGAAACTGTTGTGC     | GAAGAAAAGCCCAGTAGGC       |
| F11R (porcine)   | TCTTGTGCTCCCTGACGTTG     | AATTTCCACTCCACACGGGG      |
| GAPDH            | TGGAAGGACTCATGACCACA     | AGCACCAGTAGAAGCAGGGA      |
| GAPDH (porcine)  | AACTGCTTGGCACCCCTGGC     | CTGGAGAGCCCCTCGGCCAT      |
| GATA4            | TGGCCGCCAACCACGGC        | GCGTGGGCACGTAGACGGG       |
| GUSB (porcine)   | CCCCAGCGATGGACCCAGGA     | TCGGCCTCGAAGGGGAGGTG      |
| HGF              | TCCTAAGAAGCCGAGAGGCA     | AGCAGACATGGTCTTCCACC      |
| HGF (rat)        | GCAGACACCACACGGGCACA     | ATGGCCTCGGCTTGCCATCG      |
| IGF1 (porcine)   | GACGCTCTTCAGTTCGTGTG     | CTCCAGCCTCCTCAGATCAC      |
| IGF-1R (porcine) | CAGTCCTAGCACCTCCAAGC     | GTCTTCGGCCACCATACAGT      |
| IGF2             | TCAGGCTAGTCTCTCCTCGG     | TTGAGGGGTTCAATTTTTGG      |
| IGF2R            | GAAGGTGAAGGTCGGAGT       | GAAGATGGTGATGGGATTTC      |
| IGFBP2           | GCCCTCTGGAGCACCTCTACT    | CATCTTGCACTGTTTGAGGTTGTAC |
| Klf4             | GCGAACCACACAGGTGAGAAA    | AATGCCCGGTGCGACTTCTGG     |
| LRRC59           | GGCAGCGGCGGCTGGAAATA     | TCGCTTGGCCGCTTTGAGGG      |
| MET (porcine)    | CCCAATTTCTGACTGAGGGA     | TAGGACCACCAGTGAGAGACC     |
| MLC2V            | GAAACTTAAGGGGGCAGACC     | CCTCCTTGAAAACCTCTCC       |
| MYH7             | GCTCTCAGGTCCCTGCCAGCTTG  | GCCTCCCCAAATGCGGCCATC     |
| NKX2.5           | AAGTGCGCGCCCTCCTTCTCA    | AGCGCGCACAGCTCTTTCTTATC   |
| NRP1             | ACCCGGAGAGAGCCACCCAC     | CTGTGGCAGCTGGCCTGGTC      |
| MOYF             | CTTTCGCCGCAGACGCTGGA     | GGTGGTGGCGCTGTGCTTCT      |
| SOD1             | TCCATGTCCATCAGTTTGGA     | AGTCACATTGCCAGGTCTC       |

|       |                      |                      |
|-------|----------------------|----------------------|
| SOD2  | CTTCGTCTTCCTCCTCGTTG | AAACCTATGTGGGTTGCTCG |
| SOX2  | AGCGCATGGACAGCTACGCG | CTGCATCTGAGCCGCGCTGT |
| TNNI3 | CCAACTACCGCGCCTACGCC | CCGCTCCTCTGCCTCCCGTT |
| VEGFA | ATCTTCAAGCCGTCCTGTGT | TCTCTCCTATGTGCTGGCCT |

**Table S3.** Complete list of differentially expressed genes (DEG) in pCPC, compared with BM- MSC and HDF obtained by RNA-Seq.

**Table S4.** Complete list of DEG in pCPC compared with hCPC. The highest overexpressed genes in pCPC compared with hCPC (n=3 isolates for each cell type) are indicated in green. Those underexpressed in pCPC are indicated in red. The list has been organized according to the level of differential expression and a color code has been included, accordingly.

**Table S5.** Comparative surface markers expression levels on CPC/CSC from pig, human and mouse/rat. Expression analysis in porcine (pCPC, n=4 isolates) and human (hCPC, n=2 isolates) cells was carried out by flow cytometry. The intensity of the expression and the numbers in parenthesis correspond to the percentage of cells that express the indicated surface protein in a representative isolate for each CSC/CPC population.

| Protein | pCPC     | hCPC      | Mouse/rat<br>CSC/CPC (*) | Other names |
|---------|----------|-----------|--------------------------|-------------|
| CD15    | m-H (40) | m-H (40)  | n.d.                     | SSEA-1      |
| CD44    | vH (20)  | m-H (20)  | vH (80)                  | HCAM        |
| CD49f   | vH (20)  | vH (80)   | vH (100)                 | ITGA6       |
| CD73    | vH (20)  | m-H (100) | n.d.                     | NTSE        |
| CD90    | vH (80)  | vH (100)  | vH (100)                 | Thy1        |
| CD166   | vH (100) | m (60)    | vH (80)                  | ALCAM       |
| CD117   | m (40)   | m (40)    | m (40)                   | KIT/SCFR    |
| CD31    | null     | null      | l (40)                   | PECAM-1     |
| CD34    | null     | null      | null                     | -           |
| CD45    | null     | null      | null                     | PTPRC       |

(\*) Data for mouse/rat CSC/CPC extracted from the literature.

vH = very high; m-H = medium-high; m = medium; l = low; null = no expression; and n.d. = not determined.

**Table S6.** Surface markers expression in independent isolates of pCPC (n=4, a-d) and hCPC (n=2, hCPC3 and hCPC4). Numbers correspond to the percentage of positive cells for each surface protein in the indicated CPC population.

|               | pCPC |      |       |      | hCPC  |       |
|---------------|------|------|-------|------|-------|-------|
|               | a    | b    | c     | d    | hCPC3 | hCPC4 |
| <b>CD29</b>   | 98.0 | 98.9 | 100.0 | 96.0 | 96.3  | 96.0  |
| <b>CD44</b>   | 94.4 | 94.7 | 100.0 | 93.2 | 94.2  | 98.3  |
| <b>CD90</b>   | 97.9 | 94.8 | 98.3  | 89.5 | 78.7  | 75.3  |
| <b>CD105</b>  | 84.9 | 91.8 | 76.2  | 63.4 | 79.5  | 93.4  |
| <b>CD11R3</b> | ≤2   | ≤2   | ≤2    | ≤2   | ≤2    | ≤2    |
| <b>CD31</b>   | ≤2   | ≤2   | ≤2    | ≤2   | ≤2    | ≤2    |
| <b>CD45</b>   | ≤2   | 2.6  | ≤2    | ≤2   | ≤2    | n.d.  |

n.d. = not detected

**Table S7.** Statistical analysis of gene expression data from **Figure 5E**.

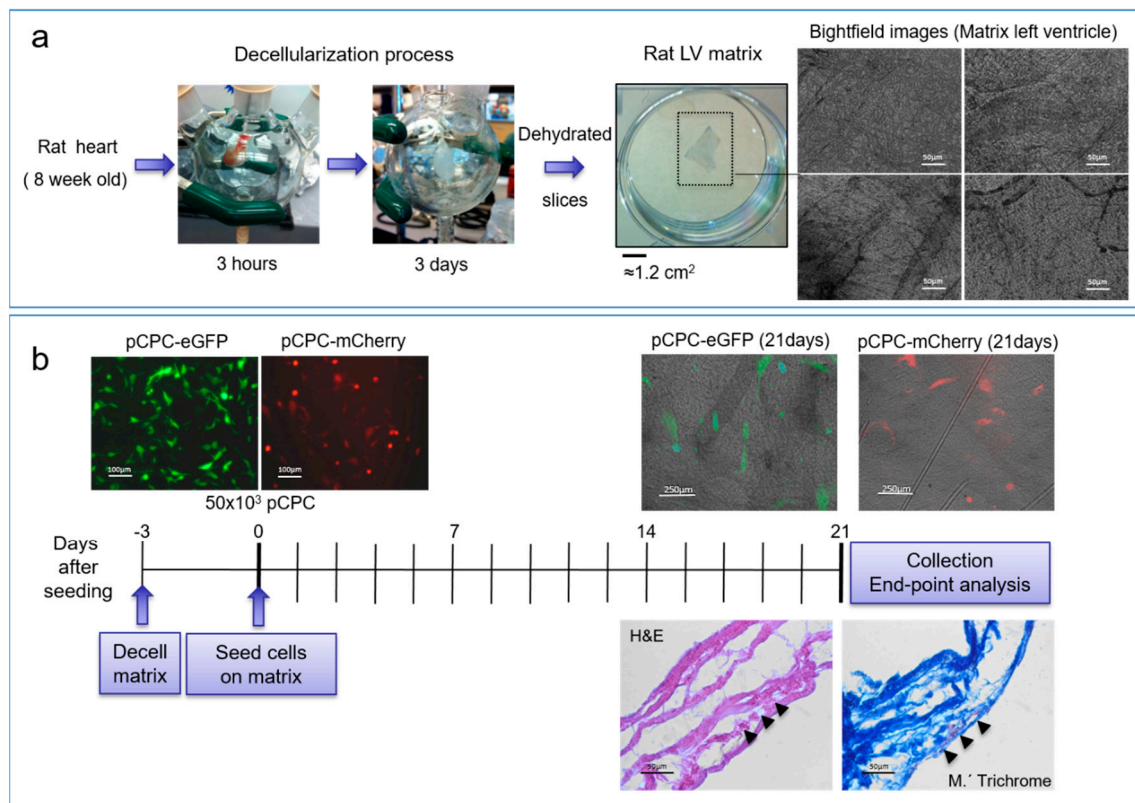

**Figure S1.** Schematic summary of (a) LV-dECM obtaining from rat heart and (b) co-culture strategy.

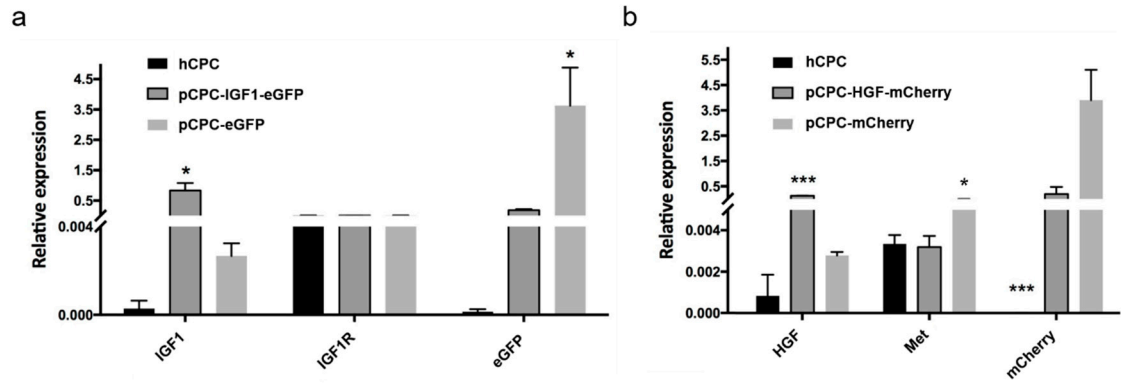

**Figure S2.** Comparison of gene expression levels by RT-qPCR of IGF-1, HGF, and their main receptors (IGF1R and Met) in engineered-pCPC populations and hCPC. Levels of (a) IGF1, IGF1R and eGFP and (b) HGF, Met and mCherry are shown. Human or porcine primers were tested for hCPC and pCPC amplifications, respectively. In the case of HGF, primers pair designed for rat origin were used (see Table S2 for more details). GAPDH was used as housekeeping gene (n=2). For IGF1: \* $p < 0.05$ , pCPC-IGF1-eGFP vs. hCPC; for eGFP: \* $p < 0.05$ , pCPC-eGFP vs. hCPC; for HGF: \*\*\* $p < 0.001$ , pCPC-HGF-mCherry vs. hCPC; for Met: \* $p < 0.05$ , pCPC-mCherry vs. hCPC; and for mCherry: \*\*\* $p < 0.001$  hCPC vs pCPC-mCherry.



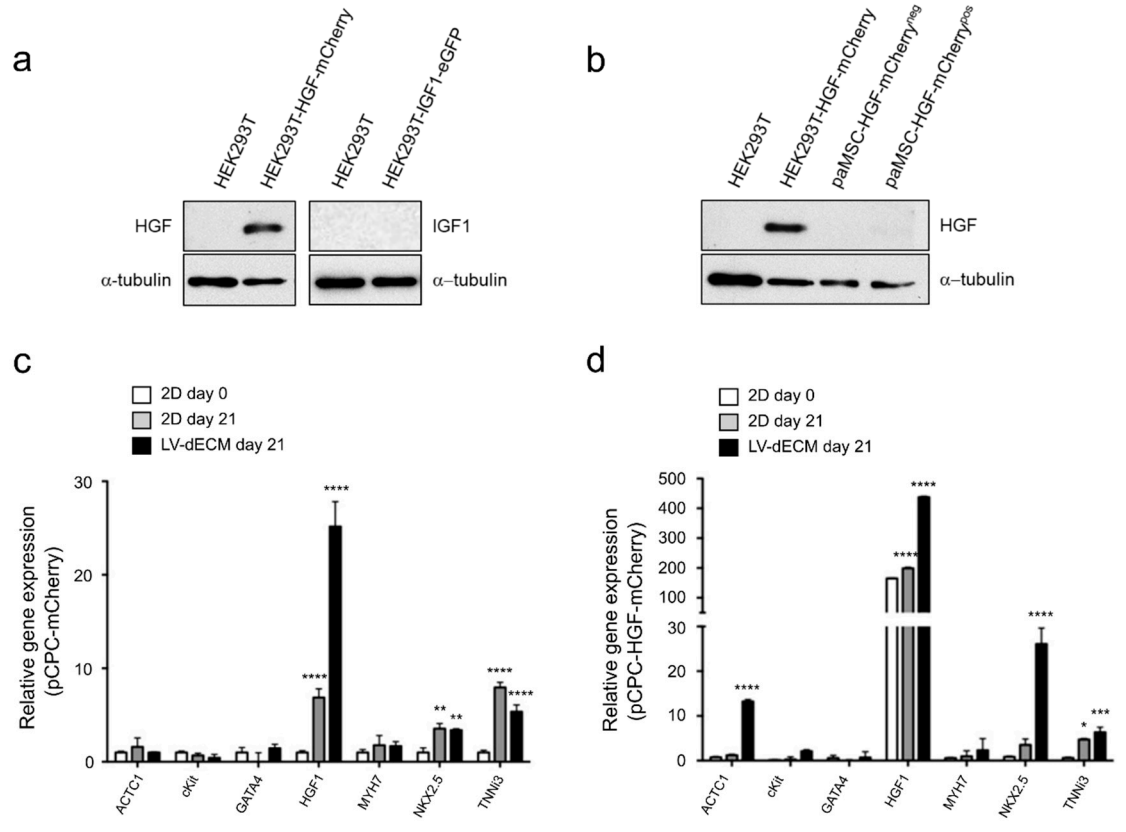

**Figure S3.** Evaluation of HGF and IGF-1 expression by western blot and characterization of HGF/mCherry cell response to co-culture with decellularized rat left ventricle (LV-dECM) scaffolds. **(a)** HEK 293T cells transfected with pRRLsin18.CMV-HGF-IRES-mCherry or pRRLsin18.CMV-IGF1-IRES-eGFP were compared by western blot for the expression of HGF and IGF-1, respectively. **(b)** Compared HGF expression levels, by western blot, in HEK 293T cells transfected with pRRLsin18.CMV-HGF-IRES-mCherry and their basal control HEK 293T, with pCPC transduced with pRRLsin18.CMV-HGF-IRES-mCherry (pCPC-HGF-mCherry) and their negative control cells (pCPC-mCherry).  $\alpha$ -tubulin was used for loading control. **(c,d)** Comparative cardiogenic gene expression of pCPC-HGF-mCherry and pCPC-mCherry co-cultured with LV-dECM scaffolds for 21 days. **(c)** Control cells (transduced with empty vector pCPC-mCherry), were culture in conventional 2D culture or on rat LV-dECM scaffolds for 21 days. For HGF1: \*\*\*\* $p \leq 0.0001$ , pCPC-mCherry 2D day 21 vs. pCPC-mCherry 2D day 0 and pCPC-mCherry dECM day 21 vs. pCPC-mCherry 2D day 0. **(d)** pCPC-HGF-mCherry cells were culture in conventional 2D culture or on rat LV-dECM scaffolds for 21 days. Expression of the indicated cardiogenic genes in both pCPC populations was evaluated by RT-qPCR (day 21) and compared with their corresponding basal expression at day 0. For HGF1: \*\*\*\* $p < 0.0001$ , pCPC-HGF-mCherry 2D day 21 vs. pCPC-HGF-mCherry 2D day 0 and pCPC-HGF-mCherry dECM day 21 vs. pCPC-HGF-mCherry 2D day 0; for NKX2.5: \*\*\*\* $p < 0.0001$ , pCPC-HGF-mCherry dECM day 21 vs. pCPC-HGF-mCherry 2D day 0; for TNNT3: \* $p < 0.05$  in pCPC-HGF-mCherry 2D day 21 vs. pCPC-HGF-mCherry 2D day 0; \*\*\* $p < 0.001$ , pCPC-HGF-mCherry dECM day 21 vs. pCPC-HGF-mCherry 2D day 0. In scaffold assays GAPDH was used as housekeeping gene ( $n=3$ ).

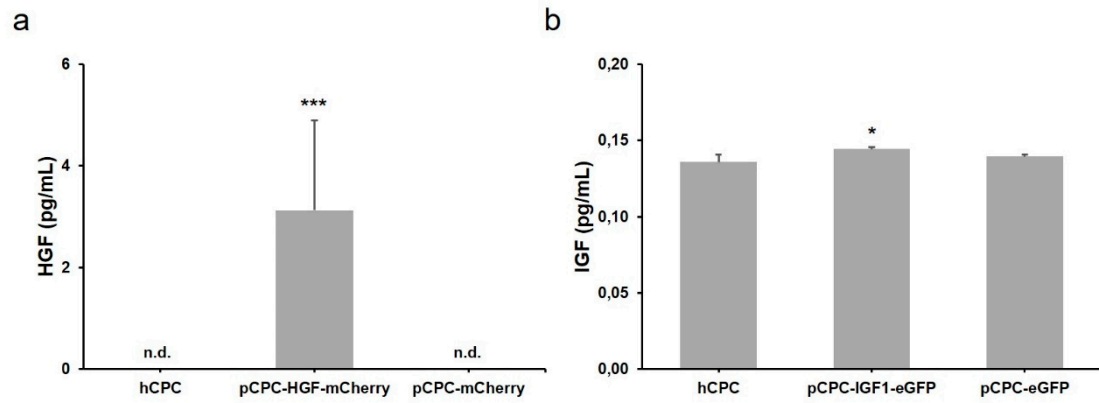

**Figure S4.** ELISA protein quantification of HGF and IGF-1 in conditioned media of pCPC transduced populations compared with hCPC. **(a)** Detection of HGF levels secreted by pCPC-HGF-mCherry and pCPC-mCherry in comparison with hCPC (n=2-4). \*\*\* $p < 0.001$  vs. hCPC; n.d.= not detected. **(b)** IGF-1 levels secreted by pCPC-IGF1-eGFP and pCPC-eGFP versus hCPC (n=2-4). \* $p < 0.05$  vs. hCPC.

## Supplementary References

1. Martin, M. Cutadapt removes adapter sequences from high-throughput sequencing reads. *EMBnet.journal* **2011**, 17, doi:10.14806/ej.17.1.200.
2. Nakazato, T.; Ohta, T.; Bono, H. Experimental Design-Based Functional Mining and Characterization of High-Throughput Sequencing Data in the Sequence Read Archive. *PLoS One* **2013**, 8, doi:10.1371/journal.pone.0077910.
3. Li, B.; Dewey, C.N. RSEM: Accurate transcript quantification from RNA-Seq data with or without a reference genome. *BMC Bioinformatics* **2011**, 12, doi:10.1186/1471-2105-12-323.
4. Robinson Mark, D.; McCarthy Davis, J.; Smyth Gordon, K. edgeR: a Bioconductor package for differential expression analysis of digital gene expression data. *Bioinformatics* **2010**, 26.
5. Alexa, A.; Rahnenfuhrer, J. topGO: topGO: Enrichment analysis for Gene Ontology. R package version 2.18.0. *R Top. Doc.* **2010**.
6. Walter, W.; Sánchez-Cabo, F.; Ricote, M. GOplot: An R package for visually combining expression data with functional analysis. *Bioinformatics* **2015**, 31, 2912–2914, doi:10.1093/bioinformatics/btv300.
